# Supplementary material for: Automated highly multiplexed super-resolution imaging of protein nano-architecture in cells and tissues
Source: PubMed Central journal article supplement (PMC7096454; doi:10.1038/s41467-020-15362-1), 2020-03-25
Supplement: 41467_2020_15362_MOESM3_ESM.pdf [file 41467_2020_15362_MOESM3_ESM.pdf]

## Description of Additional Supplementary Files

File Name: Supplementary Movie 1

Description: **Performance of the maS<sup>3</sup>TORM setup.** Video demonstrating buffer preparation, liquid exchange, approaching sample regions and image acquisition by maS<sup>3</sup>TORM.

File Name: Supplementary Movie 2

Description: **Super-resolution images of three target proteins from different imaging rounds merged in 3D space.** STORM images of phalloidin (red),  $\alpha$ -tubulin (green), and Tom20 (blue) rendered and merged in 3D
